# Supplementary material for: COVID-19 and Psychosocial Well-Being: Did COVID-19 Worsen U.S. Frontline Healthcare Workers’ Burnout, Anxiety, and Depression?
Source: MDPI journal article supplement (doi:10.3390/ijerph20054414), 2023-03-01
Supplement: s1 [file s1]

## COVID-19 and Psychosocial Well-Being: Did COVID-19 Worsen U.S. Frontline Healthcare Workers' Burnout, Anxiety, and Depression?

M. Lelinneth B. Novilla <sup>1\*</sup>, Victor B. A. Moxley <sup>2\*</sup>, Carl L. Hanson <sup>1</sup>, Alisha H. Redelfs <sup>1\*</sup>, Jeffrey Glenn <sup>1</sup>, Paola G. Donoso Naranjo <sup>1</sup>, Jenna M.S. Smith <sup>1</sup>, Lynneeth Kirsten B. Novilla <sup>1</sup>, Sarah Stone <sup>1</sup> and Rachel Lafitaga <sup>1</sup>

### Supplementary Materials

**Table S1.** Survey Instrument

| Question                                                                                                                             | Response Options                                                                                                                                                                                                                                                                                                                                                                                                                                                                                                                                                                                                                                                |
|--------------------------------------------------------------------------------------------------------------------------------------|-----------------------------------------------------------------------------------------------------------------------------------------------------------------------------------------------------------------------------------------------------------------------------------------------------------------------------------------------------------------------------------------------------------------------------------------------------------------------------------------------------------------------------------------------------------------------------------------------------------------------------------------------------------------|
| 1. *What is your profession?                                                                                                         | <ul style="list-style-type: none"> <li>a. Medical Doctor (MD)</li> <li>b. Doctor of Osteopathy (DO)</li> <li>c. Nurse Practitioner (NP)</li> <li>d. Physician Assistant (PA)</li> <li>e. Registered Nurse (RN)</li> <li>f. Medical Resident/Intern</li> <li>g. Other, please specify: _____</li> </ul>                                                                                                                                                                                                                                                                                                                                                          |
| 2. *What is your medical specialty or subspecialty?                                                                                  | <ul style="list-style-type: none"> <li>a. Emergency Medicine</li> <li>b. Family Practice</li> <li>c. Pediatrics</li> <li>d. Internal Medicine</li> <li>e. Pulmonology</li> <li>f. Neurology</li> <li>g. Gastroenterology</li> <li>h. Infectious Disease</li> <li>i. Nephrology</li> <li>j. Endocrinology</li> <li>k. Oncology</li> <li>l. Psychiatry</li> <li>m. Other, please specify: _____</li> </ul>                                                                                                                                                                                                                                                        |
| 3. *What is your current job level or employment rank?<br><i>Please click the box that most accurately describes your job level.</i> | <ul style="list-style-type: none"> <li>A.Executive Management               <ul style="list-style-type: none"> <li>a. Senior Executive</li> <li>b. Executive</li> </ul> </li> <li>B. Middle Management               <ul style="list-style-type: none"> <li>a. Senior Director</li> <li>b. Director</li> </ul> </li> <li>C.Managers &amp; Advisors               <ul style="list-style-type: none"> <li>a. Senior Manager/Advisor</li> <li>b. Manager/Advisor</li> </ul> </li> <li>D.Medical Staff               <ul style="list-style-type: none"> <li>a. Senior</li> <li>b. Associate</li> <li>c. Intermediate</li> <li>d. Entry-level</li> </ul> </li> </ul> |
| 4. *Health care setting includes various locations that offer health care services. What type                                        | <ul style="list-style-type: none"> <li>a. Acute Care Hospital</li> <li>b. Urgent Care Center</li> <li>c. Outpatient Clinic/Medical Office</li> <li>d. Telehealth</li> </ul>                                                                                                                                                                                                                                                                                                                                                                                                                                                                                     |

|                                                                                                                                                                                                                                                                                                                                  |                                                                                                                                                                                                                                                                                                                                                                                                                                    |
|----------------------------------------------------------------------------------------------------------------------------------------------------------------------------------------------------------------------------------------------------------------------------------------------------------------------------------|------------------------------------------------------------------------------------------------------------------------------------------------------------------------------------------------------------------------------------------------------------------------------------------------------------------------------------------------------------------------------------------------------------------------------------|
| of health care setting do you work in?                                                                                                                                                                                                                                                                                           | e. Orthopedic and Other Rehabilitation Center<br>f. Imaging and Radiology Center<br>g. Specialized Outpatient Service (hemodialysis, podiatry, chemotherapy, endoscopy, pain management clinic)<br>h. Mental Health & Addiction Treatment Center<br>i. Nursing Home<br>j. Skilled Nursing Facility<br>k. Dental Office<br>l. Diabetes Education Center<br>m. Birthing Center<br>n. Hospice Home<br>o. Other, please specify: _____ |
| 5. *What is the ZIP code of your medical facility?                                                                                                                                                                                                                                                                               | _____                                                                                                                                                                                                                                                                                                                                                                                                                              |
| 6. *What is your gender?                                                                                                                                                                                                                                                                                                         | a. Male<br>b. Female<br>c. Other, please specify: _____                                                                                                                                                                                                                                                                                                                                                                            |
| 7. *What is your year of birth?                                                                                                                                                                                                                                                                                                  | _____                                                                                                                                                                                                                                                                                                                                                                                                                              |
| 8. *How long have you been practicing in your current profession or medical specialty?                                                                                                                                                                                                                                           | a. 1-3 years<br>b. 4-6 years<br>c. 7-9 years<br>d. 10-12-years<br>e. 13-15 years<br>f. 16-18 years<br>g. 19-21 years<br>h. 22-24 years<br>i. 25-27 years<br>j. 28-30 years<br>k. 31 or more years                                                                                                                                                                                                                                  |
| 9. *Which of the following best describes your race/ethnicity? <i>Select all that apply.</i>                                                                                                                                                                                                                                     | a. Asian or Pacific Islander<br>b. Black or African American<br>c. Hispanic or Latino<br>d. Native American or Alaskan Native<br>e. White or Caucasian<br>f. Other                                                                                                                                                                                                                                                                 |
| 10. Are you directly taking care of COVID-19 patients including those who may be potentially infected with COVID-19? <i>Directly taking care of COVID-19 patients or those who may be potentially infected include responsibilities related to testing, hospital/clinic triage, laboratory diagnosis, radiology and imaging,</i> | a. Yes<br>b. No (proceed to Q#____)                                                                                                                                                                                                                                                                                                                                                                                                |

| <i>respiratory therapy,<br/>treatment, nursing,<br/>rehabilitation, consults or<br/>referrals.</i>            |                                                                                                                                                                                                                                                                                                                                                                                                                                                                                                                     |                       |                           |                       |                           |                    |     |                       |                       |                       |                       |                 |                       |                       |                       |                       |
|---------------------------------------------------------------------------------------------------------------|---------------------------------------------------------------------------------------------------------------------------------------------------------------------------------------------------------------------------------------------------------------------------------------------------------------------------------------------------------------------------------------------------------------------------------------------------------------------------------------------------------------------|-----------------------|---------------------------|-----------------------|---------------------------|--------------------|-----|-----------------------|-----------------------|-----------------------|-----------------------|-----------------|-----------------------|-----------------------|-----------------------|-----------------------|
| 11. Overall, how would you say COVID-19 has impacted your practice?                                           | a. No impact<br>b. Low impact<br>c. Moderate impact<br>d. High impact<br>e. Severe impact                                                                                                                                                                                                                                                                                                                                                                                                                           |                       |                           |                       |                           |                    |     |                       |                       |                       |                       |                 |                       |                       |                       |                       |
| 12. What percentage of the patients that you see daily has complaints of COVID-19-related signs and symptoms? | a. 0%<br>b. 1-25%<br>c. 25-50%<br>d. 51-75%<br>e. 76-100%                                                                                                                                                                                                                                                                                                                                                                                                                                                           |                       |                           |                       |                           |                    |     |                       |                       |                       |                       |                 |                       |                       |                       |                       |
| Over the last 2 weeks, how often have you been bothered by any of the following problems?                     |                                                                                                                                                                                                                                                                                                                                                                                                                                                                                                                     |                       |                           |                       |                           |                    |     |                       |                       |                       |                       |                 |                       |                       |                       |                       |
| 13. Little interest or pleasure in doing things <sup>PHQ-2;1,2</sup>                                          |                                                                                                                                                                                                                                                                                                                                                                                                                                                                                                                     |                       |                           |                       |                           |                    |     |                       |                       |                       |                       |                 |                       |                       |                       |                       |
|                                                                                                               | <table border="1"> <thead> <tr> <th></th> <th>0-Not at All</th> <th>1-Several Days</th> <th>2-More than Half the Days</th> <th>3-Nearly Every Day</th> </tr> </thead> <tbody> <tr> <td>Now</td> <td><input type="radio"/></td> <td><input type="radio"/></td> <td><input type="radio"/></td> <td><input type="radio"/></td> </tr> <tr> <td>Before COVID-19</td> <td><input type="radio"/></td> <td><input type="radio"/></td> <td><input type="radio"/></td> <td><input type="radio"/></td> </tr> </tbody> </table> |                       | 0-Not at All              | 1-Several Days        | 2-More than Half the Days | 3-Nearly Every Day | Now | <input type="radio"/> | <input type="radio"/> | <input type="radio"/> | <input type="radio"/> | Before COVID-19 | <input type="radio"/> | <input type="radio"/> | <input type="radio"/> | <input type="radio"/> |
|                                                                                                               | 0-Not at All                                                                                                                                                                                                                                                                                                                                                                                                                                                                                                        | 1-Several Days        | 2-More than Half the Days | 3-Nearly Every Day    |                           |                    |     |                       |                       |                       |                       |                 |                       |                       |                       |                       |
| Now                                                                                                           | <input type="radio"/>                                                                                                                                                                                                                                                                                                                                                                                                                                                                                               | <input type="radio"/> | <input type="radio"/>     | <input type="radio"/> |                           |                    |     |                       |                       |                       |                       |                 |                       |                       |                       |                       |
| Before COVID-19                                                                                               | <input type="radio"/>                                                                                                                                                                                                                                                                                                                                                                                                                                                                                               | <input type="radio"/> | <input type="radio"/>     | <input type="radio"/> |                           |                    |     |                       |                       |                       |                       |                 |                       |                       |                       |                       |
| 14. Feeling down, depressed, or hopeless <sup>PHQ-2;1,2</sup>                                                 |                                                                                                                                                                                                                                                                                                                                                                                                                                                                                                                     |                       |                           |                       |                           |                    |     |                       |                       |                       |                       |                 |                       |                       |                       |                       |
|                                                                                                               | <table border="1"> <thead> <tr> <th></th> <th>0-Not at All</th> <th>1-Several Days</th> <th>2-More than Half the Days</th> <th>3-Nearly Every Day</th> </tr> </thead> <tbody> <tr> <td>Now</td> <td><input type="radio"/></td> <td><input type="radio"/></td> <td><input type="radio"/></td> <td><input type="radio"/></td> </tr> <tr> <td>Before COVID-19</td> <td><input type="radio"/></td> <td><input type="radio"/></td> <td><input type="radio"/></td> <td><input type="radio"/></td> </tr> </tbody> </table> |                       | 0-Not at All              | 1-Several Days        | 2-More than Half the Days | 3-Nearly Every Day | Now | <input type="radio"/> | <input type="radio"/> | <input type="radio"/> | <input type="radio"/> | Before COVID-19 | <input type="radio"/> | <input type="radio"/> | <input type="radio"/> | <input type="radio"/> |
|                                                                                                               | 0-Not at All                                                                                                                                                                                                                                                                                                                                                                                                                                                                                                        | 1-Several Days        | 2-More than Half the Days | 3-Nearly Every Day    |                           |                    |     |                       |                       |                       |                       |                 |                       |                       |                       |                       |
| Now                                                                                                           | <input type="radio"/>                                                                                                                                                                                                                                                                                                                                                                                                                                                                                               | <input type="radio"/> | <input type="radio"/>     | <input type="radio"/> |                           |                    |     |                       |                       |                       |                       |                 |                       |                       |                       |                       |
| Before COVID-19                                                                                               | <input type="radio"/>                                                                                                                                                                                                                                                                                                                                                                                                                                                                                               | <input type="radio"/> | <input type="radio"/>     | <input type="radio"/> |                           |                    |     |                       |                       |                       |                       |                 |                       |                       |                       |                       |
| 15. Feeling nervous, anxious, or on edge <sup>GAD-7;3,4</sup>                                                 |                                                                                                                                                                                                                                                                                                                                                                                                                                                                                                                     |                       |                           |                       |                           |                    |     |                       |                       |                       |                       |                 |                       |                       |                       |                       |
|                                                                                                               | <table border="1"> <thead> <tr> <th></th> <th>0-Not at All</th> <th>1-Several Days</th> <th>2-More than Half the Days</th> <th>3-Nearly Every Day</th> </tr> </thead> <tbody> <tr> <td>Now</td> <td><input type="radio"/></td> <td><input type="radio"/></td> <td><input type="radio"/></td> <td><input type="radio"/></td> </tr> <tr> <td>Before COVID-19</td> <td><input type="radio"/></td> <td><input type="radio"/></td> <td><input type="radio"/></td> <td><input type="radio"/></td> </tr> </tbody> </table> |                       | 0-Not at All              | 1-Several Days        | 2-More than Half the Days | 3-Nearly Every Day | Now | <input type="radio"/> | <input type="radio"/> | <input type="radio"/> | <input type="radio"/> | Before COVID-19 | <input type="radio"/> | <input type="radio"/> | <input type="radio"/> | <input type="radio"/> |
|                                                                                                               | 0-Not at All                                                                                                                                                                                                                                                                                                                                                                                                                                                                                                        | 1-Several Days        | 2-More than Half the Days | 3-Nearly Every Day    |                           |                    |     |                       |                       |                       |                       |                 |                       |                       |                       |                       |
| Now                                                                                                           | <input type="radio"/>                                                                                                                                                                                                                                                                                                                                                                                                                                                                                               | <input type="radio"/> | <input type="radio"/>     | <input type="radio"/> |                           |                    |     |                       |                       |                       |                       |                 |                       |                       |                       |                       |
| Before COVID-19                                                                                               | <input type="radio"/>                                                                                                                                                                                                                                                                                                                                                                                                                                                                                               | <input type="radio"/> | <input type="radio"/>     | <input type="radio"/> |                           |                    |     |                       |                       |                       |                       |                 |                       |                       |                       |                       |

16. Not being able to stop or control worrying<sup>GAD-7,3,4</sup>

|                 | 0-Not at All          | 1-Several Days        | 2-More than Half the Days | 3-Nearly Every Day    |
|-----------------|-----------------------|-----------------------|---------------------------|-----------------------|
| Now             | <input type="radio"/> | <input type="radio"/> | <input type="radio"/>     | <input type="radio"/> |
| Before COVID-19 | <input type="radio"/> | <input type="radio"/> | <input type="radio"/>     | <input type="radio"/> |

17. Worrying too much about different things<sup>GAD-7,3,4</sup>

|                 | 0-Not at All          | 1-Several Days        | 2-More than Half the Days | 3-Nearly Every Day    |
|-----------------|-----------------------|-----------------------|---------------------------|-----------------------|
| Now             | <input type="radio"/> | <input type="radio"/> | <input type="radio"/>     | <input type="radio"/> |
| Before COVID-19 | <input type="radio"/> | <input type="radio"/> | <input type="radio"/>     | <input type="radio"/> |

18. Trouble relaxing<sup>GAD-7,3,4</sup>

|                 | 0-Not at All          | 1-Several Days        | 2-More than Half the Days | 3-Nearly Every Day    |
|-----------------|-----------------------|-----------------------|---------------------------|-----------------------|
| Now             | <input type="radio"/> | <input type="radio"/> | <input type="radio"/>     | <input type="radio"/> |
| Before COVID-19 | <input type="radio"/> | <input type="radio"/> | <input type="radio"/>     | <input type="radio"/> |

19. Being so restless that it's hard to sit still<sup>GAD-7,3,4</sup>

|                 | 0-Not at All          | 1-Several Days        | 2-More than Half the Days | 3-Nearly Every Day    |
|-----------------|-----------------------|-----------------------|---------------------------|-----------------------|
| Now             | <input type="radio"/> | <input type="radio"/> | <input type="radio"/>     | <input type="radio"/> |
| Before COVID-19 | <input type="radio"/> | <input type="radio"/> | <input type="radio"/>     | <input type="radio"/> |

20. Becoming easily annoyed or irritable<sup>GAD-7,3,4</sup>

|                 | 0-Not at All          | 1-Several Days        | 2-More than Half the Days | 3-Nearly Every Day    |
|-----------------|-----------------------|-----------------------|---------------------------|-----------------------|
| Now             | <input type="radio"/> | <input type="radio"/> | <input type="radio"/>     | <input type="radio"/> |
| Before COVID-19 | <input type="radio"/> | <input type="radio"/> | <input type="radio"/>     | <input type="radio"/> |

21. Feeling afraid as if something awful might happen<sup>GAD-7;3,4</sup>

|                 | 0-Not at All          | 1-Several Days        | 2-More than Half the Days | 3-Nearly Every Day    |
|-----------------|-----------------------|-----------------------|---------------------------|-----------------------|
| Now             | <input type="radio"/> | <input type="radio"/> | <input type="radio"/>     | <input type="radio"/> |
| Before COVID-19 | <input type="radio"/> | <input type="radio"/> | <input type="radio"/>     | <input type="radio"/> |

Please indicate how often you have felt the following:

22. "I feel burned out from my work."<sup>M2QSS,5</sup>

|                 | 0 - Never             | 1 - A few times a year or less | 2 - Once a month or less | 3 - A few times a month | 4 - Once a week       | 5 - A few times a week | 6 - Every day         |
|-----------------|-----------------------|--------------------------------|--------------------------|-------------------------|-----------------------|------------------------|-----------------------|
| Now             | <input type="radio"/> | <input type="radio"/>          | <input type="radio"/>    | <input type="radio"/>   | <input type="radio"/> | <input type="radio"/>  | <input type="radio"/> |
| Before COVID-19 | <input type="radio"/> | <input type="radio"/>          | <input type="radio"/>    | <input type="radio"/>   | <input type="radio"/> | <input type="radio"/>  | <input type="radio"/> |

23. "I have become more callous toward people since I took this job."<sup>M2QSS,5</sup>

|                 | 0 - Never             | 1 - A few times a year or less | 2 - Once a month or less | 3 - A few times a month | 4 - Once a week       | 5 - A few times a week | 6 - Every day         |
|-----------------|-----------------------|--------------------------------|--------------------------|-------------------------|-----------------------|------------------------|-----------------------|
| Now             | <input type="radio"/> | <input type="radio"/>          | <input type="radio"/>    | <input type="radio"/>   | <input type="radio"/> | <input type="radio"/>  | <input type="radio"/> |
| Before COVID-19 | <input type="radio"/> | <input type="radio"/>          | <input type="radio"/>    | <input type="radio"/>   | <input type="radio"/> | <input type="radio"/>  | <input type="radio"/> |

24. What aspects of your work make you feel the most stressed while treating COVID-19 patients?

*Select all that apply.*

- a. Witnessing my colleagues become infected with COVID-19
- b. Being fearful of infecting my family
- c. Balancing my duty to my patients and my personal safety (fear of becoming infected)
- d. Witnessing or learning of the death of my patients due to COVID-19
- e. Experiencing uncertainty of when the outbreak will be contained
- f. Learning of/not being able to do much because of the lack of specific treatment for COVID-19
- g. Learning about new COVID-19 cases on the news
- h. Being exhausted from working long hours
- i. Spending long hours in protective clothing
- j. Lacking in medical staff, medical equipment, personal protective equipment, and resources needed to treat COVID-19 patients
- k. Other, please specify: \_\_\_\_\_

Consider how well the following statements describe your behavior and actions on a scale from 1 to 5, where 1 means the statement does not describe you at all and 5 means it describes you very well.

25. I look for creative ways to alter difficult situations<sup>BRCS-4,58</sup>

|                 |                                 |                       |                       |                       |                            |
|-----------------|---------------------------------|-----------------------|-----------------------|-----------------------|----------------------------|
|                 | 1 - Does not describe me at all | 2                     | 3                     | 4                     | 5 - Describes me very well |
| Now             | <input type="radio"/>           | <input type="radio"/> | <input type="radio"/> | <input type="radio"/> | <input type="radio"/>      |
| Before COVID-19 | <input type="radio"/>           | <input type="radio"/> | <input type="radio"/> | <input type="radio"/> | <input type="radio"/>      |

26. Regardless of what happens to me, I believe I can control my reaction to it<sup>BRCS-4,6</sup>

|                 |                                 |                       |                       |                       |                            |
|-----------------|---------------------------------|-----------------------|-----------------------|-----------------------|----------------------------|
|                 | 1 - Does not describe me at all | 2                     | 3                     | 4                     | 5 - Describes me very well |
| Now             | <input type="radio"/>           | <input type="radio"/> | <input type="radio"/> | <input type="radio"/> | <input type="radio"/>      |
| Before COVID-19 | <input type="radio"/>           | <input type="radio"/> | <input type="radio"/> | <input type="radio"/> | <input type="radio"/>      |

27. I believe I can grow in positive ways by dealing with difficult situations<sup>BRCS-4,6</sup>

|                 |                                 |                       |                       |                       |                            |
|-----------------|---------------------------------|-----------------------|-----------------------|-----------------------|----------------------------|
|                 | 1 - Does not describe me at all | 2                     | 3                     | 4                     | 5 - Describes me very well |
| Now             | <input type="radio"/>           | <input type="radio"/> | <input type="radio"/> | <input type="radio"/> | <input type="radio"/>      |
| Before COVID-19 | <input type="radio"/>           | <input type="radio"/> | <input type="radio"/> | <input type="radio"/> | <input type="radio"/>      |

28. I actively look for ways to replace the losses I encounter in life<sup>BRCS-4,6</sup>

|                 |                                 |                       |                       |                       |                            |
|-----------------|---------------------------------|-----------------------|-----------------------|-----------------------|----------------------------|
|                 | 1 - Does not describe me at all | 2                     | 3                     | 4                     | 5 - Describes me very well |
| Now             | <input type="radio"/>           | <input type="radio"/> | <input type="radio"/> | <input type="radio"/> | <input type="radio"/>      |
| Before COVID-19 | <input type="radio"/>           | <input type="radio"/> | <input type="radio"/> | <input type="radio"/> | <input type="radio"/>      |

29. What external factors and resources listed below help you cope with the stress of treating COVID-19 patients? *Select all that apply.*

- a. Opportunities for time off from work
- b. Access to a break room stocked with food
- c. Availability of place to quarantine without infecting family
- d. Mental health support and resources in workplace
- e. Emotional support from family, friends or community members
- f. Positive social media messaging from the community
- g. Positive attitudes among my colleagues
- h. Validation/praise from my supervisor or boss
- i. Accurate guidance on infection prevention and infection control in my workplace
- j. Avoidance of news media about COVID-19

|                                                                                                                                                                                                      |                                                                                                                                                                                                                                                                                                                                                                                                                                                  |                       |                              |                       |                       |
|------------------------------------------------------------------------------------------------------------------------------------------------------------------------------------------------------|--------------------------------------------------------------------------------------------------------------------------------------------------------------------------------------------------------------------------------------------------------------------------------------------------------------------------------------------------------------------------------------------------------------------------------------------------|-----------------------|------------------------------|-----------------------|-----------------------|
|                                                                                                                                                                                                      | k. Other, please specify: _____                                                                                                                                                                                                                                                                                                                                                                                                                  |                       |                              |                       |                       |
| 30. What individual or internal assets help you cope with the stress of from treating COVID-19 patients? <i>Select all that apply.</i>                                                               | a. Achieving most of the goals that I set for myself.<br>b. Facing and accomplishing difficult tasks<br>c. Obtaining outcomes that are important to me.<br>d. Succeeding at most any endeavor to which I set my mind.<br>e. Successfully overcoming many challenges.<br>f. Confidence in performing effectively on many different tasks.<br>g. Doing most tasks well compared to other people.<br>h. Performing well even when things are tough. |                       |                              |                       |                       |
| Using a 5-point rating scale (1 = strongly disagree; 2 = disagree; 3 = neither agree nor disagree; 4 = agree; 5 = strongly agree), rate how much you agree with each of the statements listed below: |                                                                                                                                                                                                                                                                                                                                                                                                                                                  |                       |                              |                       |                       |
| 31. "I will be able to achieve most of the goals that I set for myself." <sup>NGSES-8;7</sup>                                                                                                        |                                                                                                                                                                                                                                                                                                                                                                                                                                                  |                       |                              |                       |                       |
|                                                                                                                                                                                                      | 1-Strongly Agree                                                                                                                                                                                                                                                                                                                                                                                                                                 | 2-Disagree            | 3-Neither Agree nor Disagree | 4-Agree               | 5-Strongly Agree      |
| Now                                                                                                                                                                                                  | <input type="radio"/>                                                                                                                                                                                                                                                                                                                                                                                                                            | <input type="radio"/> | <input type="radio"/>        | <input type="radio"/> | <input type="radio"/> |
| Before COVID-19                                                                                                                                                                                      | <input type="radio"/>                                                                                                                                                                                                                                                                                                                                                                                                                            | <input type="radio"/> | <input type="radio"/>        | <input type="radio"/> | <input type="radio"/> |
| 32. "When facing difficult tasks, I am certain that I will accomplish them." <sup>NGSES-8;7</sup>                                                                                                    |                                                                                                                                                                                                                                                                                                                                                                                                                                                  |                       |                              |                       |                       |
|                                                                                                                                                                                                      | 1-Strongly Agree                                                                                                                                                                                                                                                                                                                                                                                                                                 | 2-Disagree            | 3-Neither Agree nor Disagree | 4-Agree               | 5-Strongly Agree      |
| Now                                                                                                                                                                                                  | <input type="radio"/>                                                                                                                                                                                                                                                                                                                                                                                                                            | <input type="radio"/> | <input type="radio"/>        | <input type="radio"/> | <input type="radio"/> |
| Before COVID-19                                                                                                                                                                                      | <input type="radio"/>                                                                                                                                                                                                                                                                                                                                                                                                                            | <input type="radio"/> | <input type="radio"/>        | <input type="radio"/> | <input type="radio"/> |
| 33. "In general, I think that I can obtain outcomes that are important to me." <sup>NGSES-8;7</sup>                                                                                                  |                                                                                                                                                                                                                                                                                                                                                                                                                                                  |                       |                              |                       |                       |
|                                                                                                                                                                                                      | 1-Strongly Agree                                                                                                                                                                                                                                                                                                                                                                                                                                 | 2-Disagree            | 3-Neither Agree nor Disagree | 4-Agree               | 5-Strongly Agree      |
| Now                                                                                                                                                                                                  | <input type="radio"/>                                                                                                                                                                                                                                                                                                                                                                                                                            | <input type="radio"/> | <input type="radio"/>        | <input type="radio"/> | <input type="radio"/> |
| Before COVID-19                                                                                                                                                                                      | <input type="radio"/>                                                                                                                                                                                                                                                                                                                                                                                                                            | <input type="radio"/> | <input type="radio"/>        | <input type="radio"/> | <input type="radio"/> |
| 34. "I believe I can succeed at most any endeavor to which I set my mind." <sup>NGSES-8;7</sup>                                                                                                      |                                                                                                                                                                                                                                                                                                                                                                                                                                                  |                       |                              |                       |                       |
|                                                                                                                                                                                                      | 1-Strongly Agree                                                                                                                                                                                                                                                                                                                                                                                                                                 | 2-Disagree            | 3-Neither Agree nor Disagree | 4-Agree               | 5-Strongly Agree      |
| Now                                                                                                                                                                                                  | <input type="radio"/>                                                                                                                                                                                                                                                                                                                                                                                                                            | <input type="radio"/> | <input type="radio"/>        | <input type="radio"/> | <input type="radio"/> |

|  |                    |                       |                       |                       |                       |                       |  |
|--|--------------------|-----------------------|-----------------------|-----------------------|-----------------------|-----------------------|--|
|  | Before<br>COVID-19 | <input type="radio"/> |  |
|--|--------------------|-----------------------|-----------------------|-----------------------|-----------------------|-----------------------|--|

35. "I will be able to successfully overcome many challenges."<sup>NGSES-8;7</sup>

|                    |                       |                       |                                 |                       |                       |
|--------------------|-----------------------|-----------------------|---------------------------------|-----------------------|-----------------------|
|                    | 1-Strongly<br>Agree   | 2-Disagree            | 3-Neither Agree<br>nor Disagree | 4-Agree               | 5-Strongly<br>Agree   |
| Now                | <input type="radio"/> | <input type="radio"/> | <input type="radio"/>           | <input type="radio"/> | <input type="radio"/> |
| Before<br>COVID-19 | <input type="radio"/> | <input type="radio"/> | <input type="radio"/>           | <input type="radio"/> | <input type="radio"/> |

36. "I am confident that I can perform effectively on many different tasks."<sup>NGSES-8;7</sup>

|                    |                       |                       |                                 |                       |                       |
|--------------------|-----------------------|-----------------------|---------------------------------|-----------------------|-----------------------|
|                    | 1-Strongly<br>Agree   | 2-Disagree            | 3-Neither Agree<br>nor Disagree | 4-Agree               | 5-Strongly<br>Agree   |
| Now                | <input type="radio"/> | <input type="radio"/> | <input type="radio"/>           | <input type="radio"/> | <input type="radio"/> |
| Before<br>COVID-19 | <input type="radio"/> | <input type="radio"/> | <input type="radio"/>           | <input type="radio"/> | <input type="radio"/> |

37. "Compared to other people, I can do most tasks very well."<sup>NGSES-8;7</sup>

|                    |                       |                       |                                 |                       |                       |
|--------------------|-----------------------|-----------------------|---------------------------------|-----------------------|-----------------------|
|                    | 1-Strongly<br>Agree   | 2-Disagree            | 3-Neither Agree<br>nor Disagree | 4-Agree               | 5-Strongly<br>Agree   |
| Now                | <input type="radio"/> | <input type="radio"/> | <input type="radio"/>           | <input type="radio"/> | <input type="radio"/> |
| Before<br>COVID-19 | <input type="radio"/> | <input type="radio"/> | <input type="radio"/>           | <input type="radio"/> | <input type="radio"/> |

38. "Even when things are tough, I can perform quite well."<sup>NGSES-8;7</sup>

|                    |                       |                       |                                 |                       |                       |
|--------------------|-----------------------|-----------------------|---------------------------------|-----------------------|-----------------------|
|                    | 1-Strongly<br>Agree   | 2-Disagree            | 3-Neither Agree<br>nor Disagree | 4-Agree               | 5-Strongly<br>Agree   |
| Now                | <input type="radio"/> | <input type="radio"/> | <input type="radio"/>           | <input type="radio"/> | <input type="radio"/> |
| Before<br>COVID-19 | <input type="radio"/> | <input type="radio"/> | <input type="radio"/>           | <input type="radio"/> | <input type="radio"/> |

References:

1. Li, M.M.; Friedman, B.; Conwell, Y.; Fiscella, K. [Validity of the Patient Health Questionnaire 2 \(PHQ-2\) in Identifying Major Depression in Older People](#). *J Am Geriatr Soc*. 2007; 55:596-602.
2. Advancing Integrated Mental Health Solutions Center (AIMS). University of Washington Psychiatry and Behavioral Sciences Division of Population Health. Patient Health Questionnaire 2 (PHQ-2). Available at:



<https://aims.uw.edu/resource-library/patient-health-questionnaire-2-phq-2>. Updated 2021 (accessed July 23, 2020).

3. Ruiz, M.A.; Zamorano, E.; García-Campayo, J.; Pardo, A.; Freire, O.; Rejas, J. Validity of the GAD-7 scale as an outcome measure of disability in patients with generalized anxiety disorders in primary care. *J Affect Disord.* 2011;128(3): 277–286. doi: 10.1016/j.jad.2010.07.010.
4. Spitzer, R.L.; Kroenke, K.; Williams, J.B.W.; Löwe, B. A brief measure for assessing Generalized anxiety disorder: the GAD-7. *Arch Intern Med.* 2006;166(10):1092–1097. doi:10.1001/archinte.166.10.1092.
5. Li-Sauerwine, S.; Rebillot, K.; Melamed, M.; Addo, N.; Lin, M. A 2-question summative score correlates with the Maslach Burnout Inventory. *West. J. Emerg. Med.* 2020; 21(3): 610-617. doi: 10.5811/westjem.2020.2.4513. Accessed May 22, 2020. [http://escholarship.org/uc/uciem\\_westjem](http://escholarship.org/uc/uciem_westjem).
6. Sinclair, V. G.; Wallston, K. A. (2004). The Development and Psychometric Evaluation of the Brief Resilient Coping Scale. *Assessment*, 11(1), 94–101. <https://doi.org/10.1177/1073191103258144>.
7. Chen, G.; Gully, S.M.; Eden, D. Validation of a new general self-efficacy scale. *Organ Res Methods.* 2001; 4(1): 62-83. Available at: <https://spqrtools.org/mobility-measure/new-general-self-efficacy-scale/#all-survey-questions> (accessed July 23, 2020).

**Table S2.** Psychosocial impact of COVID-19 in epidemiological COVID-19 hotspots.

| Psychosocial Scales    | Difference in Index Scores Female to Male<br>t-Test <sup>a</sup> |                 |                   |                 |
|------------------------|------------------------------------------------------------------|-----------------|-------------------|-----------------|
|                        | Pre-COVID-19                                                     |                 | During COVID-19   |                 |
|                        | <i>Difference</i>                                                | <i>P- value</i> | <i>Difference</i> | <i>P- value</i> |
| Burnout (M2QSS)        | -0.406                                                           | .079            | 0.290             | .359            |
| Anxiety (GAD-7)        | -0.478                                                           | .078            | -0.010            | .985            |
| Depression (PHQ-2)     | -0.084                                                           | .345            | -0.017            | .916            |
| Resilience (BRCS)      | 0.110                                                            | .654            | 0.343             | .260            |
| Self-Efficacy (NSES-8) | 0.241                                                            | .524            | 0.506             | .306            |

<sup>a</sup> Pooled t-test of mean change

**Table S3.** Reporting of psychosocial conditions as to gender.

| Psychosocial Scales    | Difference in Index Scores Female to Male<br>t-Test <sup>a</sup> |                 |                   |                 |
|------------------------|------------------------------------------------------------------|-----------------|-------------------|-----------------|
|                        | Pre-COVID-19                                                     |                 | During COVID-19   |                 |
|                        | <i>Difference</i>                                                | <i>P- value</i> | <i>Difference</i> | <i>P- value</i> |
| Burnout (M2QSS)        | 0.359                                                            | .109            | 1.27              | <.001           |
| Anxiety (GAD-7)        | 0.642                                                            | .014            | 2.98              | <.001           |
| Depression (PHQ-2)     | 0.098                                                            | .251            | 0.557             | <.001           |
| Resilience (BRCS)      | 0.232                                                            | .375            | 0.689             | .022            |
| Self-Efficacy (NSES-8) | 0.195                                                            | .600            | 0.910             | .059            |

<sup>a</sup> Pooled t-test of mean change

**Table S4.** Variables associated with resilience during COVID (Multiple Regression)\*.

|                                | <b>Coefficient</b> | <b><i>P-value</i></b> |
|--------------------------------|--------------------|-----------------------|
| Age                            | -0.052             | .000                  |
| Goals <sup>a</sup>             | 1.409              | <.001                 |
| Difficult tasks <sup>b</sup>   | -0.126             | .004                  |
| Outcomes <sup>c</sup>          | -0.820             | .019                  |
| Overcoming <sup>d</sup>        | 1.031              | .003                  |
| Confidence <sup>e</sup>        | 0.861              | .014                  |
| Uncertainty <sup>f</sup>       | -0.904             | .005                  |
| Resources lacking <sup>g</sup> | -1.004             | .006                  |
| Intercept                      | 13.891             |                       |

\*Overall model significance  $p < .001$

<sup>a</sup> Individual/Internal Assets: "Achieving most of the goals that I set for myself"

<sup>b</sup> Individual/Internal Assets: "Facing and accomplishing difficult tasks"

<sup>c</sup> Individual/Internal Assets: "Obtaining outcomes that are important to me"

<sup>d</sup> Individual/Internal Assets: "Successfully overcoming many challenges"

<sup>e</sup> Individual/Internal Assets: "Confidence in performing effectively on many different tasks"

<sup>f</sup> Work Stress: "Experiencing uncertainty of when the outbreak will be contained"

<sup>g</sup> Work Stress: "Lacking in medical staff, medical equipment, personal protective equipment, and resources needed to treat COVID-19 patients"
